1 **The catabolism of alanine and glutamate ensure proper sporulation by**  
2 **preventing premature germination and providing energy sources**  
3 **respectively**

4  
5 Fengzhi Lyu<sup>1</sup>, Tianyu Zhang<sup>1</sup>, Dong Yang<sup>1</sup>, Meng Gui<sup>2</sup>, Yongtao Wang<sup>1</sup>, Xiaojun  
6 Liao<sup>1</sup>, Lei Rao<sup>1</sup>

7  
8 <sup>1</sup> College of Food Science and Nutritional Engineering  
9 National Engineering Research Center for Fruit and Vegetable Processing  
10 Key Laboratory of Fruit and Vegetable Processing of Ministry of Agriculture and  
11 Rural Affairs  
12 Beijing Key Laboratory for Food Non-Thermal Processing  
13 China Agricultural University  
14 Beijing, China

15  
16 <sup>2</sup> Beijing Fisheries Research Institute  
17 Beijing Academy of Agriculture and Forestry Sciences  
18 Beijing, China

19  
20  
21  
22  
23  
24 **Correspondence**

25 Lei Rao, College of Food Science and Nutritional Engineering, China  
26 Agricultural University, 100083, Beijing, China  
27 Email: rao.lei@cau.edu.cn

28

29 **ABSTRACT**

30

31 Sporulation as a typical bacterial differentiation process has been studied for  
32 decades, and the morphological events along with the molecular regulation  
33 mechanisms are relatively clear. However, two other important aspects of  
34 sporulation, (i) how sporulating cells gain energy sources to fuel sporulation  
35 proceeding, and (ii) how generated spores maintain dormancy during the whole  
36 sporulation process lack research. Here, we found that RocG-mediated  
37 glutamate metabolism was crucial for driving mother cell lysis to succeed  
38 sporulation, likely by providing energy metabolites ATP. Interestingly, high-level  
39 rocG expression generated excessively high ATP contents in sporulating cells,  
40 which caused adverse effects on the properties of the future spores, e.g. faster  
41 germination efficiency, lower DPA content along with decreased heat resistance.  
42 Moreover, we revealed that Ald-mediated alanine metabolism decreased the  
43 typical germinant L-alanine concentration to a certain level in the sporulating  
44 environment, thus avoiding premature germination and maintaining spore  
45 dormancy. Our data inferred that sporulation was a highly orchestrated and  
46 exquisite biological process requiring the balance of diverse metabolism  
47 pathways, hence ensuring both the sporulation completion and the high quality  
48 of generated spores.

## 49 INTRODUCTION

50

51 Spores are formed by bacteria belonging to the orders *Bacillales* and  
52 *Clostridiales* in response to unfavorable environmental conditions such as  
53 nutrient limitation (1, 2). Spores are metabolically dormant and considered as  
54 the most resilient living organisms due to their extreme resistance to harsh  
55 environment and can exist for even millions of years (3-5). The process of  
56 forming spores from bacterial vegetative cells is termed sporulation. Taking the  
57 model bacterium *Bacillus subtilis* as an example, the morphological process of  
58 sporulation can be divided into several stages, including asymmetric division,  
59 engulfment, spore maturation, mother cell lysis and spore release (6).  
60 Specifically, as vegetative cells commit themselves to sporulation, the earliest  
61 visible event is the asymmetric division, producing the septum to divide the  
62 vegetative cell into a larger mother cell and a smaller forespore. Subsequently,  
63 the mother cell membrane migrates around the forespore until it is completely  
64 enclosed. This phagocytosis-like process is identified as engulfment. At this  
65 time, the double-membrane structure of forespore forms, followed by the cortex  
66 synthesis and spore coat assembly. Then, the forespore chromosomes are  
67 saturated with small acid-soluble proteins (SASPs), and the water in the  
68 forespore is replaced by DPA synthesized in the mother cell, leading to  
69 forespore dehydration. These events lead to the appearance of phase-bright  
70 spores. Next, mother cell lysis occurs after spore maturation, allowing the  
71 spores to be released into the environment.

72

73 Research on the morphological events of the sporulation process, as well as  
74 the underlying gene expression and molecular mechanisms, has been  
75 continued for decades (6-10). However, relative few research focuses on how  
76 to guarantee proper sporulation, especially the quantity and quality of spores.  
77 When referred to proper sporulation, we essentially indicate two aspects. The  
78 first one is the normal progression of the sporulation event. Since sporulation

79 is considered as an energy-consuming biological process (11), the energy  
80 supply is critical to promote the progress of the sporulation event. Studies have  
81 speculated that amino acid metabolism, such as glutamate and alanine  
82 metabolism, are potential energy sources that drive sporulation (12-14).  
83 However, their regulatory mechanisms during sporulation remain unclear. The  
84 second aspect is that the spores should remain dormant during the whole  
85 sporulating process. Although depletion of nutrients in the environment is a  
86 prerequisite for sporulation initiation (15), quantities of factors that induce  
87 germination still exist around generated spores. How the spores keep dormant  
88 in that tempting environment remains a mystery to be explored. Previous  
89 research has reported that the deletion of *yIbJ*, *pdaB*, or SpoVA protein  
90 encoding genes led to the loss of dormancy maintaining ability, as these  
91 mutants exhibited premature germination during sporulation (16, 17). The  
92 reasons for premature germination are diverse, including inappropriate  
93 activation of germination receptors, incorrect assembly of spore outer structure,  
94 and deficiency in the SpoVA channel. Hence, defects in any aspect will lead to  
95 abnormal sporulation and adversely affect the quantity or quality of spores  
96 produced. However, the precise mechanism of how spore maintain dormancy  
97 during sporulation is still unclear.

98  
99 Here, we reported that the RocG-mediated glutamate metabolism played a  
100 crucial role in ensuring proper sporulation, especially promoting the mother cell  
101 lysis, by providing energy sources. We also found that high level *rocG*  
102 expression caused excessively high ATP contents in sporulating cells, which  
103 adversely affected the properties of the correspondingly generated spores,  
104 including faster germination efficiency, lower DPA content along with decreased  
105 heat resistance. Moreover, we also revealed that the Ald-mediated alanine  
106 metabolism decreased the concentration of the typical germinant L-alanine in  
107 sporulating environment to a certain level, thus avoiding premature germination  
108 and maintaining spore dormancy.

## 109 RESULTS

110

### 111 Proteins regulating alanine, aspartate and glutamate metabolism are 112 enriched by proteomics analysis during sporulation of *B. subtilis*

113

114 In order to explore the metabolic pathways crucial for *B. subtilis* sporulation,  
115 Tandem Mass Tag-based (TMT) quantitative proteomics analysis was carried  
116 out between dormant spores (DS) and sporulating vegetative cells (VC) at to  
117 (Figure 1A). Hierarchical clustering analysis (HCA) was conducted to exhibit  
118 the overall differences of protein expression between DS and VC group (Figure  
119 1B). Greater differences between groups were showed in the HCA heatmap  
120 than that within groups, indicating that the protein expression in DS and VC was  
121 significantly different. The differentially-expressed proteins were screened with  
122 the criteria  $p < 0.05$  and fold change  $> 1.2$  (the expression level increased by  
123 more than 1.2-fold or decreased by less than 0.83-fold). 1,259 proteins with  
124 increased expression as well as 1,248 proteins with decreased expression were  
125 screened out in VC group (Figure 1C). KEGG pathway enrichment analysis of  
126 these differently expressed proteins revealed the great changes in several  
127 metabolism between DS and VC groups, including alanine, aspartate and  
128 glutamate metabolism, ribosome, flagellar assembly, glyoxylate and  
129 dicarboxylate metabolism, and methane metabolism (Figure 1D). Among these  
130 pathways, the most significant changes were identified in alanine, aspartate  
131 and glutamate metabolism, suggesting their crucial roles in the sporulation of  
132 *B. subtilis*. Previous studies have indicated that *ald*, encoding alanine  
133 dehydrogenase Ald, and *rocG*, encoding glutamate dehydrogenase RocG, are  
134 crucial regulators of alanine and glutamate metabolism, respectively (13, 18).  
135 In addition,  $\Delta ald$  and  $\Delta rocG$  mutants have been verified to exhibit remarkable  
136 sporulation deficiency (13, 14). However, the deletion of *ansB* gene, encoding  
137 L-aspartase important for aspartate metabolism, has no significant effect on  
138 sporulation (19). Hence, the effects of alanine and glutamate metabolism on

139 sporulation were further explored in this work.

140

141 **Alanine and glutamate metabolism co-regulate sporulation with an**  
142 **additive effect**

143

144 Since alanine and glutamate metabolism have been reported separately to be  
145 involved in sporulation (13, 14, 20), we wonder if these two pathways can jointly  
146 affect the sporulation process. To verify this hypothesis, we constructed  $\Delta ald$   
147  $\Delta rocG$  mutant and observed that significant fewer phase-bright spores were  
148 produced in the double mutant strain than in  $\Delta ald$  or  $\Delta rocG$  mutants (Figure 2A).

149 This result indicated that the sporulation defect of  $\Delta ald \Delta rocG$  mutant was more  
150 significant than that of  $\Delta ald$  or  $\Delta rocG$  mutants. This was further demonstrated  
151 by examining the heat-resistant spores produced in sporulation, as the  
152 percentage of  $\Delta ald$  and  $\Delta rocG$  spores was 10.9% and 29.8% respectively, while  
153  $\Delta ald \Delta rocG$  mutant was only 0.3% (Figure 2B). The severe sporulation  
154 deficiency of  $\Delta ald \Delta rocG$  mutant suggested that Ald and RocG co-regulated  
155 sporulation in an additive effect. Moreover, quantities of phase-dark forespores  
156 were observed in  $\Delta ald \Delta rocG$  mutant (Figure 2A), which could be attributed to  
157 two reasons including (i) limited energy sources supporting the sporulation  
158 proceeding, or (ii) premature germination caused by abnormal spore structure  
159 assembly or inappropriate in-situ sporulating environment (16). We then  
160 deleted *gerAA* to investigate if premature germination occurred in  $\Delta ald \Delta rocG$   
161 mutant. As shown in Figure 3A, the sporulation defect of the double mutant was  
162 partially rescued, as 29.7% of phase-bright spores formed in  $\Delta ald \Delta rocG$   
163  $\Delta gerAA$  ( $\Delta 3$ ) mutant, indicating that premature germination indeed existed.  
164 However, the only partial rescue effect suggested that premature germination  
165 was not the exclusive reason of the sporulation defect in  $\Delta ald \Delta rocG$  mutant.  
166 Hence, the limitation of energy support can still be a substantial explanation of  
167 sporulation defect phenotype of the double mutant strain. We then explored  
168 these two possibilities in the following work.

169 **RocG-mediated glutamate metabolism, but not Ald-mediated alanine**  
170 **metabolism, is essential for ensuring the sporulation efficiency and the**  
171 **spore quality likely through energy supply**

172

173 As the Ald and RocG mediated alanine and glutamate metabolisms were  
174 proposed as potential energy sources for sporulation (13, 14), we speculated  
175 that these two metabolic pathways provided energy support separately. If this  
176 was the case, excessive complementation of either metabolism pathway should  
177 be able to rescue the sporulation defect of the  $\Delta ald \Delta rocG$  mutant. Here, we  
178 used  $\Delta ald \Delta rocG \Delta gerAA$  ( $\Delta 3$ ) strain to exclude the premature germination  
179 effect and independently explored the energy supply mechanism in this part  
180 (Figure 3A). Based on this, *ald* and *rocG* were artificially expressed separately  
181 and jointly in  $\Delta 3$  under IPTG-inducible promoter. Results showed that elevating  
182 the expression level of *ald* by increasing the concentration of IPTG up to 5 mM  
183 had no significant effect on the quantity of phase-bright spores in  $\Delta 3$  mutant,  
184 with the sporulation percentage between 20% and 30% (Figure S1, Figure S2A).  
185 Accordingly, these spores showed significant germination deficiency under  
186 AGFK induction (Figure S2B, Figure 3C). However, the elevated *rocG*  
187 expression level upon addition of at least 10 mM IPTG restored the sporulation  
188 of  $\Delta 3$  mutant to 53.4%, similar with that of wild-type (56.8%) (Figure 3B).  
189 Moreover, when more than 20 mM IPTG was added, the germination deficiency  
190 of  $\Delta 3$  mutant spores was recovered to the level of wild-type (Figure S2B, Figure  
191 3C). Notably,  $\Delta 3$  mutant with IPTG-induced *ald* and *rocG* co-expression  
192 showed the same sporulation and germination phenotypes as that with IPTG-  
193 induced *rocG* sole expression (Figure S2B, Figure 3C). Hence, in  $\Delta 3$  mutant,  
194 the sole complementation of RocG succeeded to rescue the sporulation defect,  
195 but not the case for that of Ald. This indicated that RocG-mediated glutamate  
196 metabolism appeared to regulate sporulation by providing energy sources  
197 whereas Ald-mediated alanine metabolism may not play the same role.

198

199 To further explore if these two catabolism pathways are involved in controlling  
200 the spore quality, mutants of transcription factors of Ald and RocG,  $\Delta adeR$  and  
201  $\Delta ahrC \Delta rocR$  (14, 21), were respectively constructed to test the germination  
202 phenotype of the spores. *gerAA* was also knocked out in these mutants to  
203 ensure the comparability of experimental results. The deletion of transcription  
204 factors was demonstrated to lower, instead of eliminating the expression of  
205 regulated genes (Figure 4B), and rescued the sporulation deficiency (Figure  
206 4A). Interestingly, no significant germination defect was observed in spores of  
207  $\Delta adeR \Delta gerAA$  mutant with decreased expression of *ald* (Figure 4C). However,  
208 spores of  $\Delta ahrC \Delta rocR \Delta gerAA$  mutant with low expression of *rocG* showed  
209 remarkable germination deficiency (Figure 4C). Moreover, spores of  $\Delta adeR$   
210  $\Delta ahrC \Delta rocR \Delta gerAA$  mutant exhibited similar germination deficiency  
211 phenotype with that of  $\Delta ahrC \Delta rocR \Delta gerAA$  mutant spores (Figure 4C),  
212 indicating that the expression of *rocG*, not *ald*, was essential for ensuring spore  
213 quality with normal germination capability. Taken together, these results  
214 strongly implied that the RocG-mediated glutamate metabolism regulated both  
215 the sporulation efficiency and spore quality likely by energy supply. As for the  
216 Ald-mediated alanine metabolism, its effect on sporulation was not likely  
217 executed by providing energy sources. Instead, it is more likely associated with  
218 premature germination, as quantities of phase-dark spores were observed in  
219 the sporulating cells of  $\Delta ald$  mutant (Figure 2A).

220

### 221 **Ald inhibits premature germination during sporulation by regulating L-** 222 **alanine content in the external environment of spores**

223

224 As mentioned above, the occurrence of phase-dark spores in  $\Delta ald$  mutant  
225 drove us to investigate the effect of Ald-mediated alanine metabolism on  
226 premature germination. As shown in Figure 5,  $\Delta ald$  mutant generated large  
227 amounts of phase-dark spores, and the percentage of phase-bright spores was  
228 only 11.5%. However, the deletion of *gerAA* in  $\Delta ald$  mutant significantly raised



229 the percentage of phase-bright spores to 61.5%, nearly close the wild type  
230 (76.5%). In addition, no significant germination deficiency was observed in  $\Delta ald$   
231  $\Delta gerAA$  spores when compared with wild-type (Figure 5C). Thus, it could  
232 conclude that the absence of Ald caused sporulation defect by inducing  
233 premature germination during sporulation. In order to identify the period of  
234 premature germination occurrence, the sporulation process of  $\Delta ald$  mutant was  
235 examined by time-lapse microscopy. Interestingly, two models of premature  
236 germination were observed as (i) forespores prematurely germinated during  
237 mother cell lysis, and then released; (ii) dormant spores were released, and  
238 then induced to premature germination (Figure 5D).

239

240 The association of Ald and premature germination raised up an interesting  
241 speculation that the interruption of alanine metabolism may lead to the over-  
242 accumulation of L-alanine, which triggers premature germination. To test this  
243 possibility, *ald* was artificially expressed in  $\Delta ald$  mutant under IPTG-inducible  
244 promoter, and the sporulation phenotype as well as the environmental L-alanine  
245 content at later sporulation phase ( $t_{19}$ ) of these mutants were examined. Results  
246 showed that the percentage of phase-bright spores gradually increased with  
247 elevating the expression level of *ald* (Figure 6A-6C). Notably, the expression of  
248 *ald* exhibited a decrease when the concentration of added IPTG increased to 1  
249 mM, which was possibly due to the toxicity of IPTG to cells (Figure 6C). In  
250 contrast, the opposite trend was observed for environmental L-alanine  
251 concentration of  $\Delta ald$  mutant, which reached to 3397.4  $\mu\text{M}$  without IPTG  
252 induction, while decreased to wild-type levels of 145.9  $\mu\text{M}$  when > 200  $\mu\text{M}$  IPTG  
253 was added to elevate the expression of *ald* (Figure 6B). Consequently, Ald-  
254 mediated alanine metabolism was responsible for controlling the L-alanine  
255 content in the external environment of spores to prevent premature germination,  
256 and thus ensuring proper sporulation.

257

258 **RocG regulates both the  $\sigma^K$ -dependent spore release and spore**

259 **properties by providing energy sources**

260

261 As indicated above, RocG-mediated glutamate metabolism regulated both  
262 sporulation efficiency and spore quality likely by energy supporting. To further  
263 investigate this, we first explored the specific sporulation stage interrupted by  
264 *rocG* deletion. To this end, we constructed the fusion of *gfp* to the promotor of  
265 sporulation stage-specific sigma factors,  $\sigma^F$ ,  $\sigma^E$ ,  $\sigma^G$ , and  $\sigma^K$ , which regulate  
266 polar division, engulfment, spore maturation and spore release, respectively (6,  
267 10, 22, 23). In general, the activation of the specific  $\sigma$  factor can be reflected by  
268 the  $\sigma$ -dependent GFP fluorescence, thus visually displaying the impaired  
269 sporulation stage (22). Results showed that the activation of  $\sigma^F$  and  $\sigma^E$  in  $\Delta rocG$   
270 mutant were similar with that in wild-type (Figure 7A-7B). As for  $\sigma^G$ , its activation  
271 can be achieved in  $\Delta rocG$  mutant although the activation time was delayed  
272 (Figure 7C). Notably, although the  $\sigma^K$ -dependent GFP fluorescence in  $\Delta rocG$   
273 mutant appeared properly at  $t_7$ , it abnormally existed even until  $t_{25}$  (Figure 7D).  
274 As  $\sigma^K$  is responsible for regulating the cell wall degrading enzymes, leading to  
275 mother cell lysis and spore release (24, 25), its fluorescence is supposed to  
276 disappear with spore release. The presence of  $\sigma^K$ -dependent GFP fluorescence  
277 at the end of sporulation of  $\Delta rocG$  mutant indicated that its  $\sigma^K$  was activated in  
278 the mother cell but failed to regulate mother cell lysis, inferring the impaired  
279 spore release process in  $\Delta rocG$  mutant (Figure 7E).

280

281 To further understanding the regulating role of RocG in sporulation, *rocG* was  
282 artificially expressed in  $\Delta rocG$  mutant under IPTG-inducible promoter. The  
283 results showed that the percentage of released spores increased significantly  
284 with elevating the expression level of *rocG* (Figure 8A, B). The addition of more  
285 than 10  $\mu$ M IPTG could remarkably improve the percentage of spore release to  
286 the wild-type level (Figure 8B). As hypothesized previously, RocG-mediated  
287 glutamate metabolism could provide energy sources to drive sporulation  
288 proceeding, we then tested the ATP levels in sporulating cells to verify this.

289 Since previous research has demonstrated that the ATP content of mother cells  
290 during sporulation is highest at  $t_1$  (14, 26), we examined ATP content at  $t_1$  in  
291  $\Delta rocG$  mutant with different *rocG* expression levels. Accordingly, the level of  
292 ATP in  $\Delta rocG$  mutant increased with elevating the *rocG* expression (Figure 8C).  
293 Notably, the ATP content of  $\Delta rocG$  mutant with 50  $\mu$ M IPTG induction was  
294 almost double of the wild type (Figure 8C). Then, we wondered if such high  
295 level of ATP in sporulating cells could affect the properties of the future spores.  
296 To test this, the spores generated under different concentrations of IPTG  
297 induction were purified and examined for the germination phenotypes as well  
298 as the DPA content and heat resistance. Interestingly,  $\Delta rocG$  spores with 50  $\mu$ M  
299 IPTG induction showed higher germination efficiency but significantly lower  
300 DPA content as well as decreased heat resistance than the wild-type spores  
301 (Figure 8D, Figure S3). Taken together, the expression of *rocG* can indeed  
302 provide energy support for sporulation, at least the spore release regulated by  
303  $\sigma^K$ , thus contributing to the proper sporulation process. However, exceeded  
304 expression of *rocG* can accumulate excessive ATP in sporulating cells, which  
305 might adversely affect the spore properties.

306

## 307 **DISCUSSION**

308

309 Sporulation as a typical bacterial differentiation process has been extensively  
310 studied for decades, and the morphological events along with the signal  
311 transduction for this process are relatively well elucidated (6-10). However, as  
312 an energy-consuming process, the sources of energy supply and the underlying  
313 regulating mechanism are lack of research. In addition, how the generated  
314 spores keep in dormant state during sporulation remains mysterious. Here, we  
315 proved that Ald-mediated alanine metabolism decreased the concentration of  
316 the typical germinant L-alanine in sporulating environment to a certain level,  
317 thus avoiding premature germination and maintaining spore dormancy.  
318 Moreover, we also provided evidences supporting that RocG-mediated

319 glutamate metabolism ensured proper sporulation, especially mother cell lysis,  
320 by regulating ATP levels during sporulation. Additionally, excessively high ATP  
321 levels during the sporulation process was supposed to adversely affect the  
322 properties of the spores produced, including faster germination efficiency, lower  
323 DPA content along with decreased heat resistance. Our data revealed that  
324 sporulation was a highly orchestrated and exquisite biological process requiring  
325 the balance of diverse metabolism pathways, e.g. alanine catabolism to  
326 eliminate surrounding germinants, and glutamate metabolism providing  
327 appropriate level of energy to ensure both the sporulation completion and high  
328 quality of generated spores.

329

330 Our finding of alanine catabolism eliminating the germinant L-alanine leads to  
331 another open question that which catabolism pathways or biological reactions  
332 are responsible for regulating the balance of other germinants during  
333 sporulation. Indeed, in *B. cereus* and *B. subtilis* spores, alanine racemases  
334 converting the germinant L-alanine to germination inhibitor D-alanine are  
335 detected in the coat, thus they can potentially prevent premature germination  
336 (27, 28). As for the glutamate metabolism, except for the metabolite ATP,  
337 whether other metabolic intermediates are involved in sporulation needs to be  
338 further investigated. In fact, the metabolite 2-oxoglutarate can participate in the  
339 synthesis of amino acids, nucleotides, and NADH, and thus is able to potentially  
340 affect spore formation (29). Finally, since glutamate is a universal amino group  
341 donor and commonly exists in all living organisms (30), whether the other  
342 spore-forming bacteria also employ glutamate metabolism as the energy  
343 sources for sporulation remains an interesting question worth to be further  
344 explored.

345

## 346 **METHODS**

347

### 348 **Strains and plasmids**

349 *B. subtilis* strains used in this study are listed Table S1. Plasmids construction  
350 is listed in Table S2, and primers are described in Table S3. For gene  
351 replacement strategy, primer pairs were used to amplify the flanking genomic  
352 regions of the corresponding gene. PCR products and the respective antibiotic  
353 resistance gene were used for Gibson assembly (NEB, USA) (31). The product  
354 was used to transform *B. subtilis* PY79 to obtain the mutant allele.

355

## 356 **General methods**

357

358 Sporulation of *B. subtilis* was carried out at 37°C by suspending cells in  
359 Schaeffer's liquid medium (Difco Sporulation Medium, DSM) (32). Sporulation  
360  $t_0$  was identified as the third hour after spores suspending in DSM. The  
361 percentage of sporulation was evaluated by calculating the ratio of total number  
362 of colonies forming units (CFU) before and after heat treatment (80°C, 20 min)  
363 (33). The percentage of phase-bright or released spores were counted based  
364 on the according phase-contrast images. To ensure confidence of the data, at  
365 least 800 cells were counted for each experiment. Spore germination with  
366 different germinants was examined as described previously with some  
367 modification (14, 34). Briefly, purified spores were heat activated at 75°C for 30  
368 min, and then induced by L-Ala (10 mM) or AGFK (2.5 mM L-Asparagine, 5  
369 mg/mL D-glucose, 5 mg/mL D-fructose, and 50 mM KCl) at 37°C, by DDA (1  
370 mM in 10 mM Tris-HCl, pH 7.4) at 42°C. The germination was tested by  
371 determining the DPA release as described in the following text.

372

## 373 **Spore purification**

374

375 Matured spores were purified as described previously (14). Briefly, 22 hrs DSM  
376 culture was centrifuged and washed 3 times by DDW and then kept in 4°C with  
377 constant agitation. The suspension was washed once a day and resuspended  
378 in DDW. After 7 days, the suspension was centrifuged to collect the pellet. 20%

379 histodenz solution was used to resuspend the pellet at a ratio of 400  $\mu$ L per 10  
380 mL of DSM for 30 min on ice. Aliquots (200  $\mu$ L) of resuspension mixture were  
381 then added on top of 900  $\mu$ L 50% histodenz solution, and gradient fractionation  
382 was carried out by centrifugation at 15,000 rpm at 4°C for 30 min. The pellet  
383 was collected and washed at least 5 times by DDW. Phase contrast microscopy  
384 was then used to evaluate the purity of pellet spores. Spores with >99% purity  
385 can be used for following experiments, otherwise the purification steps should  
386 be carried out more than once.

387

### 388 **Tandem Mass Tag-based (TMT) quantitative proteomics analysis**

389

390 TMT quantitative proteomics analysis was carried out between pure dormant  
391 spores (DS) and vegetative cells (VC) at sporulation  $t_0$  by APTBIO (Shanghai,  
392 China). DS and VC samples were collected by centrifugation and then freeze-  
393 dried and bead-grinded using FastPrep-24 (M. P. Biomedicals, LLC, USA).  
394 Samples were then extracted for proteins and performed the proteomics  
395 analysis by LC-MS/MS system. A statistical analysis was performed using a t-  
396 test to determine the significance (p-value) of differentially-expressed proteins.  
397 The expression level of proteins with  $p < 0.05$  and fold change  $> 1.2$  (the  
398 expression level increased by more than 1.2-fold or decreased by less than  
399 0.83-fold) were considered as significant difference.

400

### 401 **DPA measurements**

402

403 DPA release was detected as described previously with some modifications  
404 (35). Briefly, spore germination was induced by L-Ala, AGFK or DDA at 37°C or  
405 42°C in a 96-well plate. Spores ( $OD_{600}$  of 10), 10 mM germinants, 25 mM K-  
406 Hepes buffer (pH 7.4) as well as 50 mM  $TbCl_3$  were mixed in 200  $\mu$ L and  $Tb^{3+}$ -  
407 DPA fluorescence intensity was monitored at Ex/Em = 270/545 nm by a TECAN  
408 Spark 10M microplate reader (TECAN, Switzerland). Total DPA content of

409 spores were evaluated by boiling the spores (OD<sub>600</sub> of 1) for 20 min and mixing  
410 the spores and 50 mM TbCl<sub>3</sub> to 200 μL in a 96-well plate. The DPA standard  
411 solution was serially diluted and detected together to obtain a standard curve.  
412 The detection parameters for DPA release were the same as above, and the  
413 total DPA content of spores was calculated based on the standard curve.

414

#### 415 **Phase-contrast and fluorescence microscopy**

416

417 Phase-contrast and fluorescence microscopy were performed using a Nikon  
418 DS-Qi2 microscope equipped with a Nikon Ph3 DL 100x/1.25 Oil phase contrast  
419 objective. Both bacterial cells (500 μL) and spores (50 μL) were centrifuged,  
420 and the pellets were resuspended with 5 ~ 10 μL PBSx1 and then imaged on  
421 the pad. For fluorescence imaging, 1,000 ms exposure time was required for  
422 GFP. For time-lapse imaging of sporulation, Imaging System Cell Chamber  
423 (Attofluor<sup>TM</sup> Cell Chamber) was used. Sporulating cells were collected at the  
424 late sporulation stage by centrifugation and imaged on a DSM gel-pad with 1%  
425 agarose at 37°C. Image analysis and processing were performed by ImageJ2.

426

#### 427 **Real-Time Quantitative PCR (RT-qPCR)**

428

429 Real-time quantitative PCR (RT-qPCR) was carried out followed the protocol  
430 described previously (14). RNA samples of sporulating cells (500 μL) were  
431 collected from DSM by centrifugation, and then extracted by FastPure  
432 Cell/Tissue Total RNA Isolation Kit V2 (Vazyme Biotech Co.,Ltd). HiScript III All  
433 in-one RT SuperMix for qPCR (Vazyme Biotech Co.,Ltd) was used to reverse  
434 transcribed RNA samples. RT-qPCR reactions were conducted with  
435 PerfectStart Green qPCR SuperMix (TransGen Biotech Co., Ltd). CFX Connect  
436 RealTime PCR Detection System (Bio-Rad) was used to detect the fluorescence  
437 and *scr* gene that has unchangeable expression level during sporulation was  
438 selected to normalize sample data. Each sample was detected in triplicate and

439 at least three independent measurements were conducted.

440

#### 441 **Environmental L-alanine content assay**

442

443 Measurement of environmental L-Alanine level was performed as the  
444 instruction of Amplite Fluorimetric L-Alanine Assay Kit (AAT Bioquest, Inc.).  
445 DSM media of sporulating cells at indicated timepoints was collected from the  
446 supernatant after centrifugation. The fluorescence intensity of L-Alanine in DSM  
447 media was monitored by TECAN Spark 10M microplate reader (TECAN,  
448 Switzerland) at Ex/Em = 540/590 nm. The standard solution of L-alanine was  
449 serially diluted and detected together to obtain a standard curve, and the L-  
450 Alanine content in the environment was calculated based on the standard curve.

451

#### 452 **ATP content assay**

453

454 Measurement of ATP content in mother cell was performed using the BacTiter-  
455 Glo Microbial Cell Viability Assay (Promega). As guided by the instructions,  
456 sporulating cells in DSM at  $t_1$  were collected and detected luminescence using  
457 a TECAN Spark 10M microplate reader (TECAN, Switzerland). The standard  
458 solution of ATP was serially diluted and detected together to obtain a standard  
459 curve and the ATP level was calculated based on the standard curve.

460

#### 461 **Data processing**

462

463 Unless stated otherwise, each experiment was carried out at least three times.  
464 GraphPad Prism 8 software was used for all statistical analysis, data  
465 processing, and graph drawing. One-way ANOVA was performed to analyze  
466 the variance and  $p < 0.05$  was regarded as significance for all data statistics.

467



468 **ACKNOWLEDGEMENTS**

469

470 We are grateful to Dr. Bing Zhou (The Hebrew University of Jerusalem) for  
471 valuable discussions and comments. This work was supported by National  
472 Natural Science Foundation of China (NSFC) (grant No. 32372470), NSFC  
473 (grant No. 32001658), Agricultural Research Outstanding Talents of China  
474 (grant No. 13210317) awarded to Lei Rao, and 2115 Talent Development  
475 Program of China Agricultural University. The authors declare no conflicts of  
476 interest.

477

478 **REFERENCES**

479

480 (1) Driks A. 2002. Maximum shields: the assembly and function of the bacterial  
481 spore coat. *Trends Microbiol.* 10:251-254.

482 (2) Stragier P. Losick R. 1996. Molecular genetics of sporulation in *Bacillus*  
483 *subtilis*. *Annu. Rev. Genet.* 30:297-241.

484 (3) Nicholson W L, Munakata N, Horneck G, Melosh H J. Setlow P. 2000.  
485 Resistance of *Bacillus* endospores to extreme terrestrial and extraterrestrial  
486 environments. *Microbiol. Mol. Biol. Rev.* 64:548-572.

487 (4) Setlow P. 2006. Spores of *Bacillus subtilis*: their resistance to and killing by  
488 radiation, heat and chemicals. *J. Appl. Microbiol.* 101:514-525.

489 (5) Vreeland R H, Rosenzweig W D. Powers D W. 2000. Isolation of a 250  
490 million-year-old halotolerant bacterium from a primary salt crystal. *Nature*  
491 407:897-900.

492 (6) Riley E P, Schwarz C, Derman A I. Lopez-Garrido J. 2020. Milestones in  
493 *Bacillus subtilis* sporulation research. *Microb Cell* 8:1-16.

494 (7) Tokuyasu K. Yamada E. 1959. Fine Structure of *Bacillus subtilis*: II.  
495 Sporulation Progress. *The Journal of Cell Biology* 5:129-133.

496 (8) Kawata T, Inoue T. Takagi A. 1963. Electron microscopy of spore formation  
497 and germination in *Bacillus subtilis*. *Jpn. J. Microbiol.* 7:23-41.

498 (9) Piggot P. Coote J. 1976. Genetic aspects of bacterial endospore formation.  
499 *Bacteriol. Rev.* 40:908-962.

500 (10) Errington J. 2003. Regulation of endospore formation in *Bacillus subtilis*.  
501 *Nat. Rev. Microbiol.* 1:117-126.

502 (11) Phillips Z. Strauch M. 2002. *Bacillus subtilis* sporulation and stationary  
503 phase gene expression. *Cell. Mol. Life Sci.* 59:392-402.

504 (12) Charba J. Nakata H. 1977. Role of glutamate in the sporogenesis of  
505 *Bacillus cereus*. *J. Bacteriol.* 130:242-248.

506 (13) Siranosian K J, Ireton K. Grossman A D. 1993. Alanine dehydrogenase  
507 (ald) is required for normal sporulation in *Bacillus subtilis*. *J. Bacteriol.*

508 175:6789-6796.

509 (14) Rao L, Zhou B, Serruya R, Moussaieff A, Sinai L, Ben-Yehuda S.  
510 2022. Glutamate catabolism during sporulation determines the success of the  
511 future spore germination. *iScience* 25:105242.

512 (15) Driks A. 2002. Overview: development in bacteria: spore formation in  
513 *Bacillus subtilis*. *Cell. Mol. Life Sci.* 59:389-391.

514 (16) Ramírez - Guadiana F H, Meeske A J, Wang X, Rodrigues C D.  
515 Rudner D Z. 2017. The *Bacillus subtilis* germinant receptor GerA triggers  
516 premature germination in response to morphological defects during sporulation.  
517 *Mol. Microbiol.* 105:689-704.

518 (17) Gao Y, Barajas-Ornelas R D C, Amon J D, Ramírez-Guadiana F H,  
519 Alon A, Brock K P, Marks D S, Kruse A C, Rudner D Z. 2022. The SpoVA  
520 membrane complex is required for dipicolinic acid import during sporulation and  
521 export during germination. *Genes Dev.* 36:634-646.

522 (18) Belitsky B R, Sonenshein A L. 1998. Role and regulation of *Bacillus subtilis*  
523 glutamate dehydrogenase genes. *J. Bacteriol.* 180:6298-6305.

524 (19) Yoshida K, Fujita Y, Ehrlich S D. 1999. Three asparagine synthetase  
525 genes of *Bacillus subtilis*. *J. Bacteriol.* 181:6081-6091.

526 (20) de Vries Y P, Atmadja R D, Hornstra L M, de Vos W M, Abee T. 2005.  
527 Influence of glutamate on growth, sporulation, and spore properties of *Bacillus*  
528 *cereus* ATCC 14579 in defined medium. *Appl. Environ. Microbiol.* 71:3248-3254.

529 (21) Lin T H, Wei G T, Su C C, Shaw G C. 2012. AdeR, a PucR-type  
530 transcription factor, activates expression of L-alanine dehydrogenase and is  
531 required for sporulation of *Bacillus subtilis*. *J. Bacteriol.* 194:4995-5001.

532 (22) Meeske A J, Rodrigues C D, Brady J, Lim H C, Bernhardt T G.  
533 Rudner D Z. 2016. High-throughput genetic screens identify a large and diverse  
534 collection of new sporulation genes in *Bacillus subtilis*. *PLoS Biol.* 14:e1002341.

535 (23) Hilbert D W, Piggot P J. 2004. Compartmentalization of gene expression  
536 during *Bacillus subtilis* spore formation. *Microbiol. Mol. Biol. Rev.* 68:234-262.

537 (24) Nugroho F A, Yamamoto H, Kobayashi Y, Sekiguchi J. 1999.

538 Characterization of a new sigma-K-dependent peptidoglycan hydrolase gene  
539 that plays a role in *Bacillus subtilis* mother cell lysis. *J. Bacteriol.* 181:6230-  
540 6237.

541 (25) Smith T J. Foster S J. 1995. Characterization of the involvement of two  
542 compensatory autolysins in mother cell lysis during sporulation of *Bacillus*  
543 *subtilis* 168. *J. Bacteriol.* 177:3855-3862.

544 (26) Updegrave T B, Harke J, Anantharaman V, Yang J, Gopalan N,  
545 Wu D, Piszczek G, Stevenson D M, Amador-Noguez D. Wang J D. 2021.  
546 Reformulation of an extant ATPase active site to mimic ancestral GTPase  
547 activity reveals a nucleotide base requirement for function. *elife* 10:e65845.

548 (27) Stewart B T. Halvorson H O. 1953. Studies on the spores of aerobic  
549 bacteria I: the occurrence of alanine racemase. *J. Bacteriol.* 65:160-166.

550 (28) Yasuda Y, Kanda K, Nishioka S, Tanimoto Y, Kato C, Saito A,  
551 Fukuchi S, Nakanishi Y. Tochikubo K. 1993. Regulation of L-alanine-initiated  
552 germination of *Bacillus subtilis* spores by alanine racemase. *Amino Acids* 4:89-  
553 99.

554 (29) Huergo L F. Dixon R. 2015. The emergence of 2-oxoglutarate as a master  
555 regulator metabolite. *Microbiol. Mol. Biol. Rev.* 79:419-435.

556 (30) Gundlach J, Commichau F M. Stülke J. 2018. Perspective of ions and  
557 messengers: an intricate link between potassium, glutamate, and cyclic di-AMP.  
558 *Curr. Genet.* 64:191-195.

559 (31) Guérout-Fleury A-M, Frandsen N. Stragier P. 1996. Plasmids for ectopic  
560 integration in *Bacillus subtilis*. *Gene* 180:57-61.

561 (32) Harwood C R. Cutting S M. *Molecular biological methods for Bacillus*;  
562 Chichester ; New York : Wiley, 1990.

563 (33) Zhou B, Semajski M, Orlovetskie N, Bhattacharya S, Alon S,  
564 Argaman L, Jarrous N, Zhang Y, Macek B, Sinai L. Ben-Yehuda S. 2019.  
565 Arginine dephosphorylation propels spore germination in bacteria. *Proc. Natl.*  
566 *Acad. Sci. USA* 116:14228-14237.

567 (34) Vepachedu V R. Setlow P. 2007. Role of SpoVA proteins in release of

568 dipicolinic acid during germination of *Bacillus subtilis* spores triggered by  
569 dodecylamine or lysozyme. *J. Bacteriol.* 189:1565-1572.

570 (35) Yi X. Setlow P. 2010. Studies of the commitment step in the germination of  
571 spores of *Bacillus* species. *J. Bacteriol.* 192:3424-3433.

572

573 **Figure legends**

574

575 **Figure 1.** TMT quantitative proteomic analysis. (A) Proteins were compared  
576 between dormant spores (DS) and vegetative cells (VC) of at the onset of  
577 sporulation ( $T_0$ ); (B) Heatmap of differential expression of proteins in DS  
578 samples were grouped using Hierarchical Cluster Analysis. Each line  
579 represented a protein, with  $FC > 1.2$  and  $p < 0.05$  (T-test) as the screening  
580 criteria. The proteins with significantly decreased expression were marked in  
581 blue, the proteins with significantly increased expression were in red, the  
582 proteins without quantitative information were in gray; (C) The volcano map of  
583 proteins in DS group was drawn based on two factors of fold change (FC) of  
584 differential expression and the P value of T test. The proteins with significantly  
585 decreased expression ( $FC < 0.83$ ,  $p < 0.05$ ) were marked in blue, the proteins  
586 with significantly increased expression ( $FC > 1.2$ ,  $p < 0.05$ ) were in red, and the  
587 non-differentiated proteins were in gray; (D) The enrichment map (Top 20) of  
588 KEGG pathway enrichment analysis of differentially expressed proteins in the  
589 DS group by Fisher's exact test. The color of the bubble represents the  
590 significance of the enriched KEGG pathway, and the color gradient represents  
591 the size of the P-value ( $-\log_{10}$ ), and the closer to red, the smaller the P-value.  
592 The size of the bubble represents the amount of differential protein.

593

594 **Figure 2.** Alanine and glutamate metabolism co-regulate sporulation with an  
595 additive effect. (A) Phase-contrast images of sporulating cells at the late  
596 sporulation stage  $t_{19}$ . *B. subtilis* PY79 (wt), YZ11 ( $\Delta ald$ ), YZ19 ( $\Delta rocG$ ), YZ12  
597 ( $\Delta ald \Delta rocG$ ) and YZ13 ( $\Delta ald \Delta rocG$ , *amyE::ald-rocG*) strains were induced to  
598 sporulate in DSM at 37°C for 22 hrs and followed by microscopy. Images  
599 captured from a representative experiment out of three independent biological  
600 repeats. Scale bar, 2  $\mu m$ ; (B) The percentage of sporulation of the strains  
601 described in (A). Data are presented as the percentage of total number of  
602 colonies forming units (CFU) before and after heat treatment (80°C, 20 min).

603 Shown are average values and SD obtained from three independent biological  
604 repeats.

605

606 **Figure 3.** RocG-mediated glutamate metabolism is essential for ensuring the  
607 sporulation efficiency. (A) Phase-contrast images of sporulating cells at the late  
608 sporulation stage  $t_{19}$ . *B. subtilis* PY79 (wt), YZ22 ( $\Delta ald \Delta rocG \Delta gerAA$ ), YZ24  
609 ( $\Delta ald \Delta rocG \Delta gerAA$ , *amyE::P<sub>IPTG</sub>-rocG*), YZ25 ( $\Delta ald \Delta rocG \Delta gerAA$ ,  
610 *amyE::P<sub>IPTG</sub>-ald*) and YZ26 ( $\Delta ald \Delta rocG \Delta gerAA$ , *amyE::P<sub>IPTG</sub>-rocG-ald*) strains  
611 were induced to sporulate in DSM at 37°C for 22 hrs and followed by  
612 microscopy. 50  $\mu$ M IPTG was added to the YZ24, YZ25 and YZ26 cultures at  
613 the sporulation  $t_0$  to induce corresponding gene expression. Images captured  
614 from a representative experiment out of three independent biological repeats.  
615 Scale bar, 2  $\mu$ m; (B) Quantification of the experiment described in (A). Data are  
616 presented as percentages of the number of the phase-bright spores and all  
617 sporulating cells in the same image. Shown are average values and SD  
618 obtained from three independent biological repeats ( $n \geq 800$  for each strain);  
619 (C) Spores of wt, as well as YZ24, YZ25 and YZ26 strains with 50  $\mu$ M IPTG  
620 induction, were incubated with AGFK (10 mM) to trigger germination. DPA  
621 release was measured by detecting the relative fluorescence units (RFU) of  
622  $Tb^{3+}$ -DPA. Shown is a representative experiment out of three independent  
623 biological repeats.

624

625 **Figure 4.** The expression of *rocG* is significant to the quality of correspondingly  
626 generated spores. (A) Phase-contrast images of sporulating cells at the late  
627 sporulation stage  $t_{19}$ . *B. subtilis* PY79 (wt), YZ81 ( $\Delta adeR \Delta gerAA$ ), YZ23  
628 ( $\Delta ahrC \Delta rocR \Delta gerAA$ ) and YZ90 ( $\Delta adeR \Delta ahrC \Delta rocR \Delta gerAA$ ) strains were  
629 induced to sporulate in DSM at 37°C for 22 hrs and followed by microscopy.  
630 Images captured from a representative experiment out of three independent  
631 biological repeats. Scale bar, 2  $\mu$ m; (B) Expression of the *ald* gene in wt, YZ11

632 ( $\Delta ald$ ) and YZ81 strains, and *rocG* gene in wt, YZ19 ( $\Delta rocG$ ) and YZ23 strains;  
633 (C) Spores of wt, YZ81, YZ23 and YZ90 strains were incubated with AGFK (10  
634 mM) to trigger germination. DPA release was measured by detecting the  
635 relative fluorescence units (RFU) of Tb<sup>3+</sup>-DPA. Shown is a representative  
636 experiment out of three independent biological repeats.

637

638 **Figure 5.** The absence of Ald induces premature germination during sporulation.

639 (A) Phase-contrast images of sporulating cells at the late sporulation stage t<sub>19</sub>.

640 *B. subtilis* PY79 (wt), YZ11 ( $\Delta ald$ ) and YZ21 ( $\Delta ald \Delta gerAA$ ) strains were  
641 induced to sporulate in DSM at 37°C for 22 hrs and followed by microscopy.

642 Images captured from a representative experiment out of three independent  
643 biological repeats. Scale bar, 2  $\mu$ m; (B) Quantification of the experiment

644 described in (A). Data are presented as percentages of the number of the  
645 phase-bright spores and all sporulating cells in the same image. Shown are

646 average values and SD obtained from three independent biological repeats (n  
647  $\geq$  800 for each strain); (C) Spores of wt, YZ11 and YZ21 strains were incubated

648 with AGFK (10 mM) to trigger germination. DPA release was measured by  
649 detecting the relative fluorescence units (RFU) of Tb<sup>3+</sup>-DPA. Shown is a

650 representative experiment out of three independent biological repeats. (D)

651 Models of the premature germination in  $\Delta ald$  mutant. YZ11 strain was induced  
652 to sporulate in DSM at 37°C. After 14 hrs of incubation, spores were collected

653 on a DSM gel-pad, and followed by time-lapse microscopy at a 10 min interval.  
654

655 **Figure 6.** Ald-mediated alanine metabolism regulates L-alanine content in the

656 external environment of spores. (A) Phase-contrast images of sporulating cells

657 at the late sporulation stage t<sub>19</sub>. YZ31 ( $\Delta ald$ , *amyE::P<sub>IPTG</sub>-ald*) strains were  
658 induced to sporulate in DSM at 37°C for 22 hrs and followed by microscopy. 0-

659 1000  $\mu$ M IPTG was added at the sporulation t<sub>0</sub> to induce *ald* expression. Images  
660 captured from a representative experiment out of three independent biological

661 repeats. Scale bar, 2  $\mu$ m; (B) The percentage of phase-bright spores as well as



662 the environmental L-alanine content of the wt and YZ31 strains described in (A).  
663 The percentage of phase-bright spores are presented as ratio of the number of  
664 the phase-bright spores and all sporulating cells in the same image ( $n \geq 800$  for  
665 each strain). The environmental L-alanine content was evaluated at the end of  
666 sporulation; (C) Expression of the *ald* gene in YZ31 strains described in (A).  
667 Shown are average values and SD obtained from three independent biological  
668 repeats.

669

670 **Figure 7.** Cytological sporulation assay reveals the impaired sporulation stage  
671 of  $\Delta rocG$  mutants. (A-D) Phase contrast and the indicated fluorescent images  
672 of wt and YZ19 ( $\Delta rocG$ ) cells harboring four transcriptional fusions,  $\sigma^F$ ,  $\sigma^E$ ,  $\sigma^G$   
673 and  $\sigma^K$ , at sporulation  $t_2$ ,  $t_{2.5}$ ,  $t_4$  and  $t_{25}$ ,  $t_7$  and  $t_{25}$ , respectively. Images captured  
674 from a representative experiment out of three independent biological repeats.  
675 Scale bar, 2  $\mu\text{m}$ ; (E) Models of the sporulation defect in  $\Delta rocG$  mutants.

676

677 **Figure 8.** RocG regulates both spore release and spore properties. (A) Phase-  
678 contrast images of sporulating cells at the late sporulation stage  $t_{19}$ . *B. subtilis*  
679 PY79 (wt), YZ19 ( $\Delta rocG$ ) and YZ32 ( $\Delta rocG$ , *amyE::P<sub>IPTG</sub>-rocG*) strains were  
680 induced to sporulate in DSM at 37°C for 22 hrs and followed by microscopy. 0-  
681 50  $\mu\text{M}$  IPTG was added to YZ32 at the sporulation  $t_0$  to induce *rocG* expression.  
682 Images captured from a representative experiment out of three independent  
683 biological repeats. Scale bar, 2  $\mu\text{m}$ ; (B) Quantification of the experiment  
684 described in (A). Data are presented as percentages of the number of the  
685 released spores and all sporulating cells in the same image. Shown are  
686 average values and SD obtained from three independent biological repeats ( $n$   
687  $\geq 800$  for each strain); (C) Strains indicated in (A) were grown in DSM  
688 sporulation medium. IPTG was added to the YZ32 cultures at the  $t_0$  to induce  
689 *rocG* expression. The DSM cultures were collected at  $t_1$  and analyzed for ATP  
690 level. Shown are average values and SD obtained from three independent  
691 biological repeats. (D) Spores of wt and YZ32 strains with different IPTG

692 induction were incubated with (i) L-alanine (10 mM), (ii) AGFK (10 mM) and (iii)  
693 DDA (10 mM) to trigger germination. Total DPA content (iv) of these spores were  
694 measured by boiling for 20 min. DPA release was measured by detecting the  
695 relative fluorescence units (RFU) of Tb<sup>3+</sup>-DPA. Shown is a representative  
696 experiment out of three independent biological repeats.  
697

# Figure 1

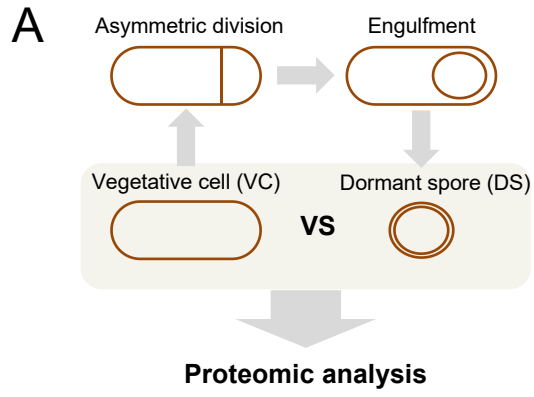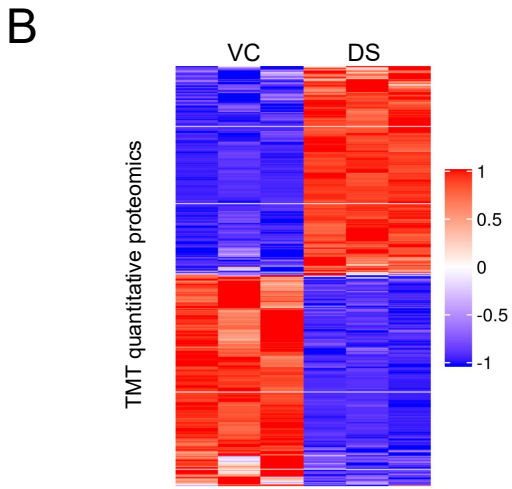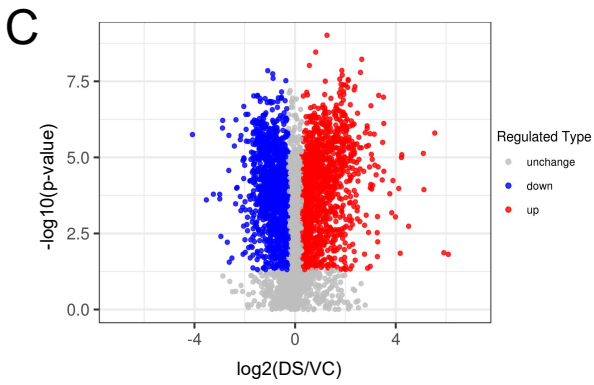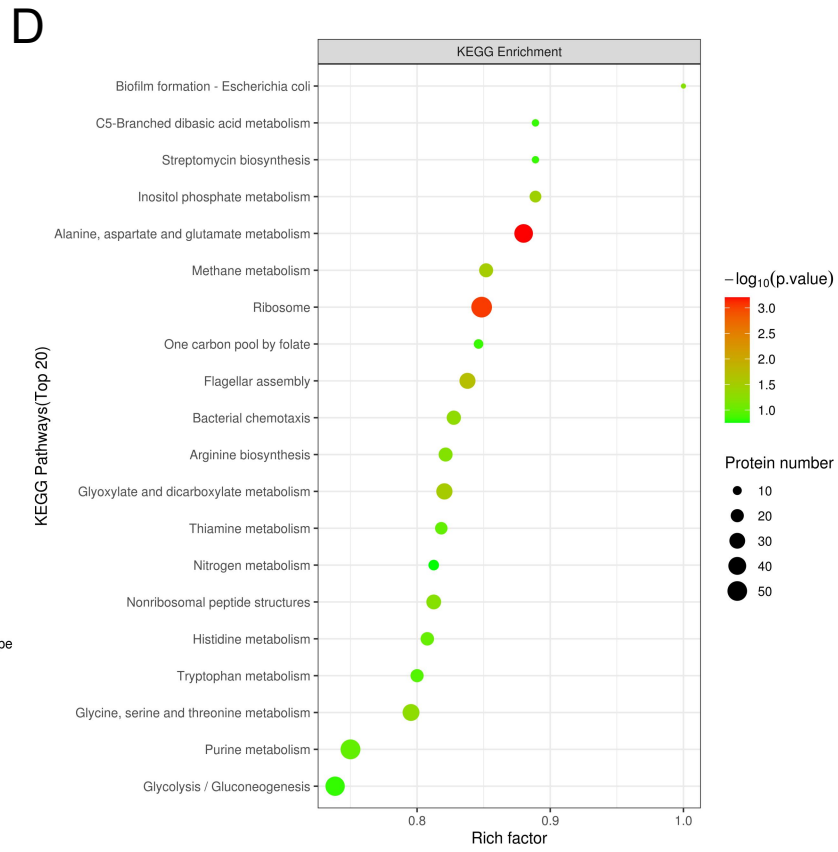

**Figure 2**

**A**

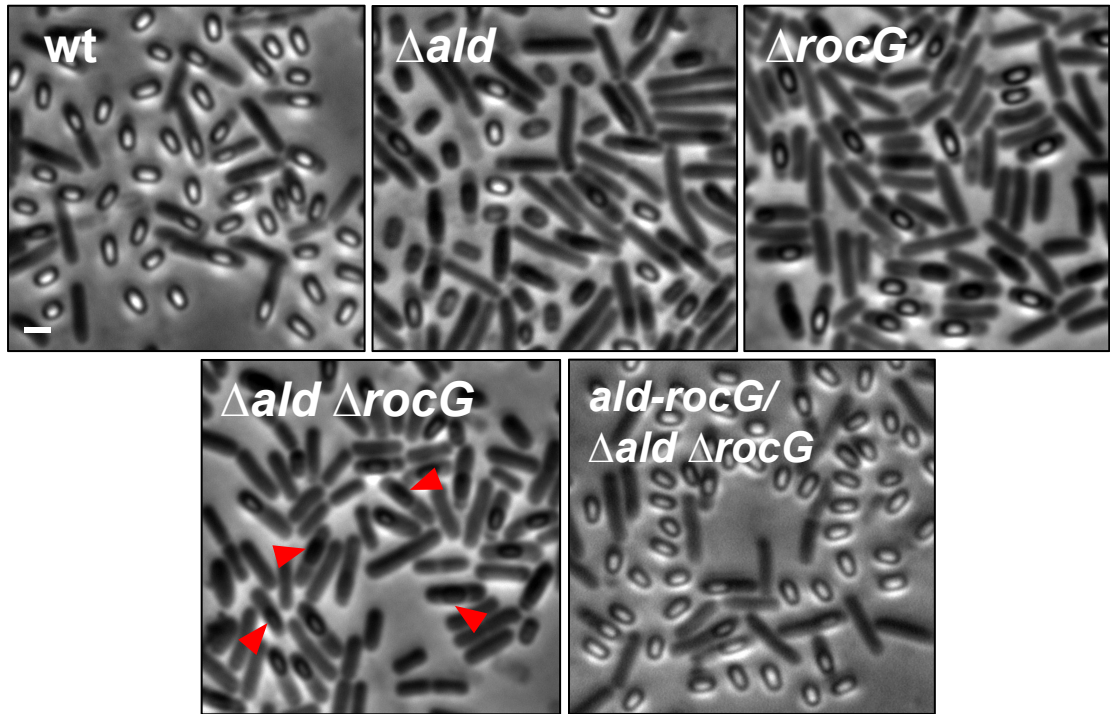

**B**

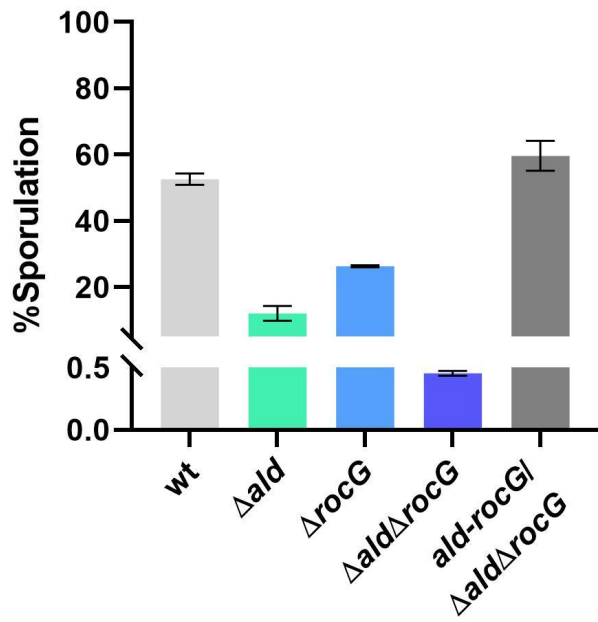

**Figure 3**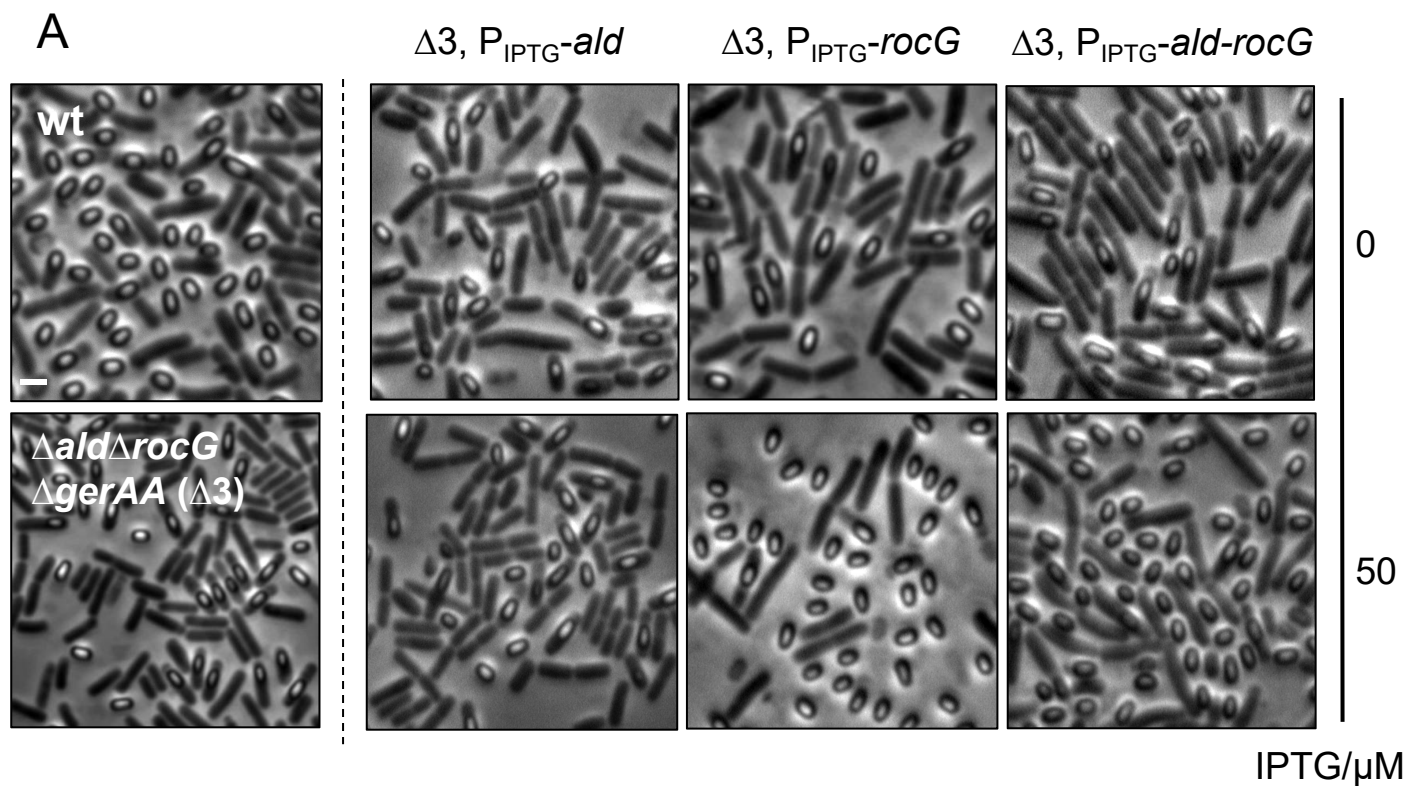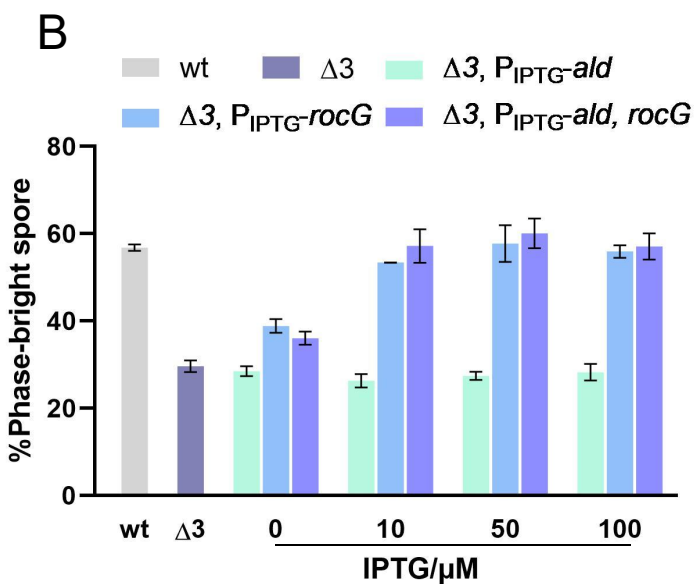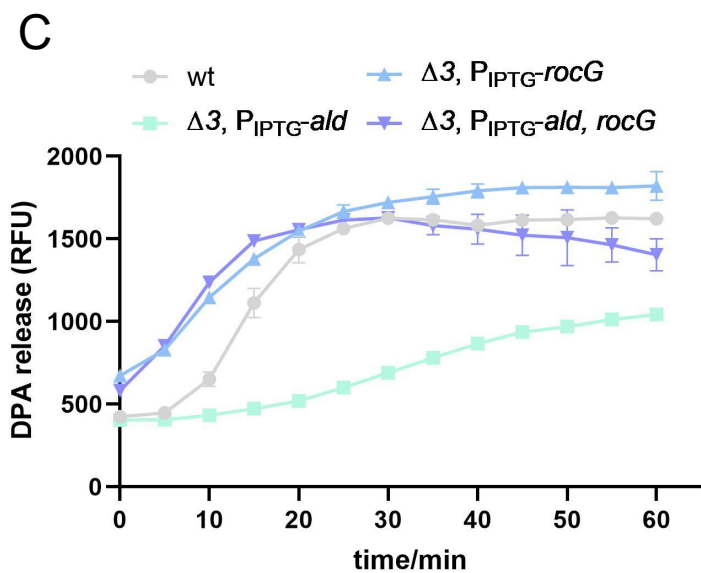

**Figure 4****A**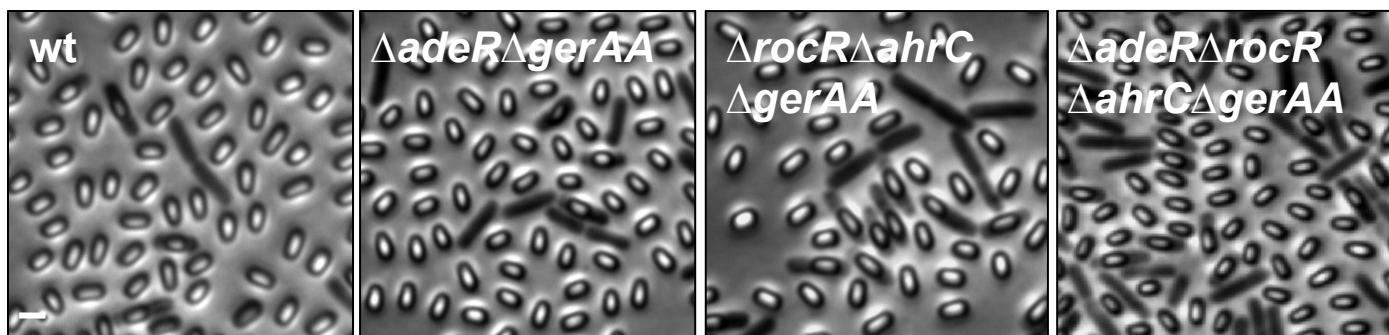**B**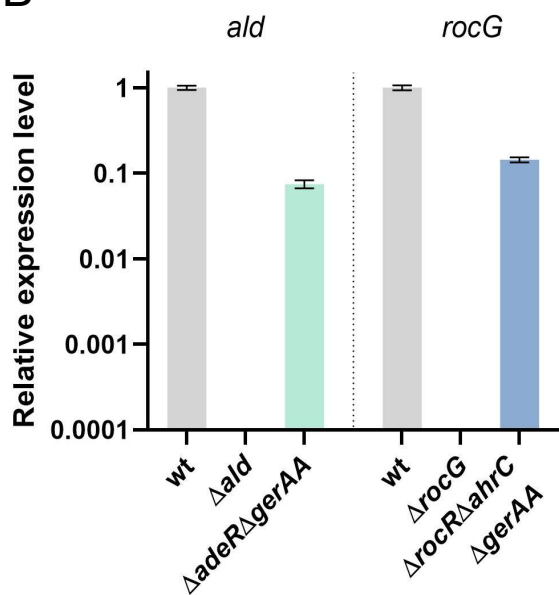**C**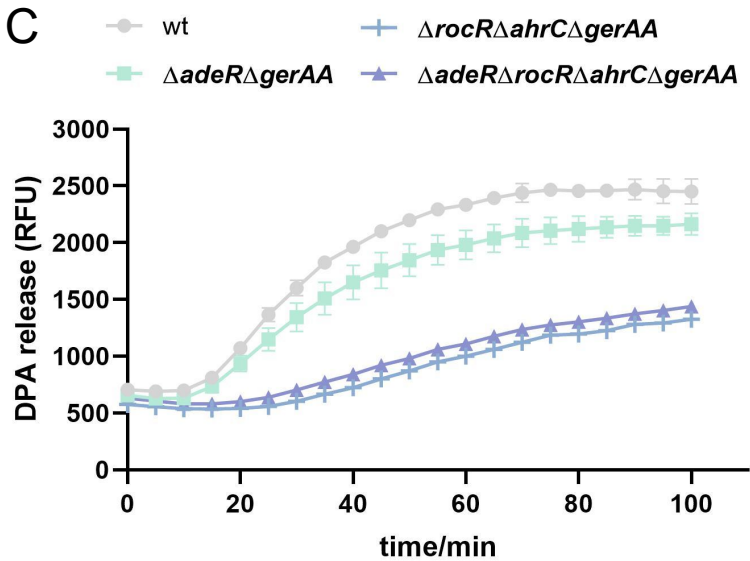

Figure 5

A

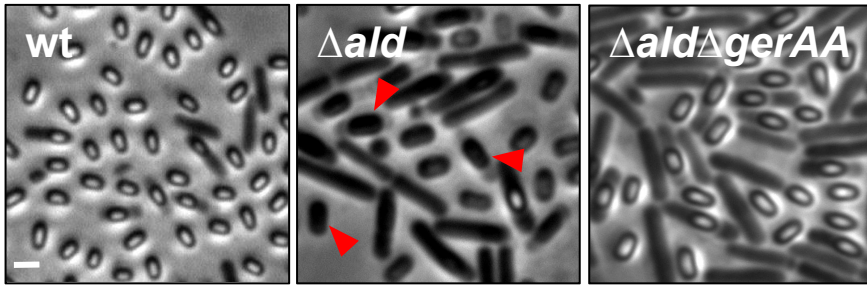

B

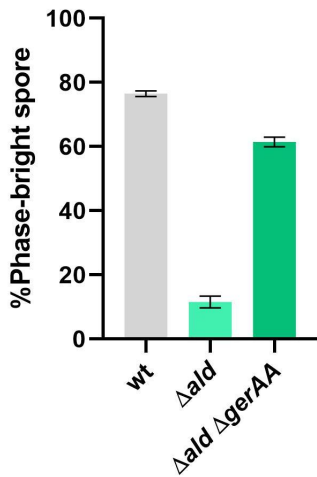

C

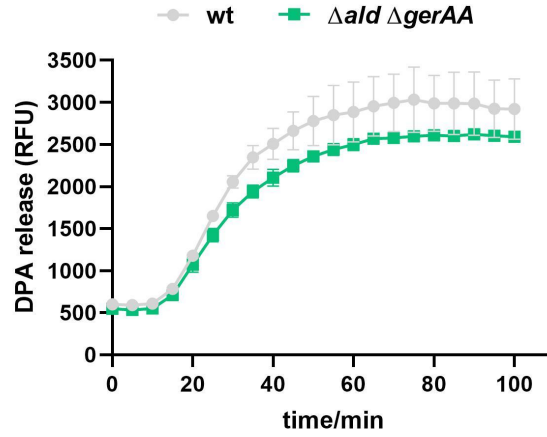

D

$\Delta ald$

(i) Mother cell lysis

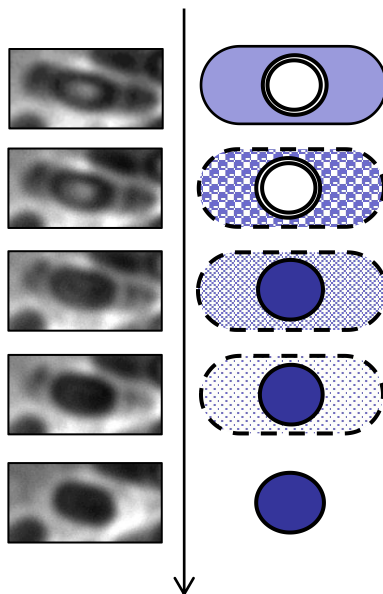

Germinated  
spore release

(ii) Spore release

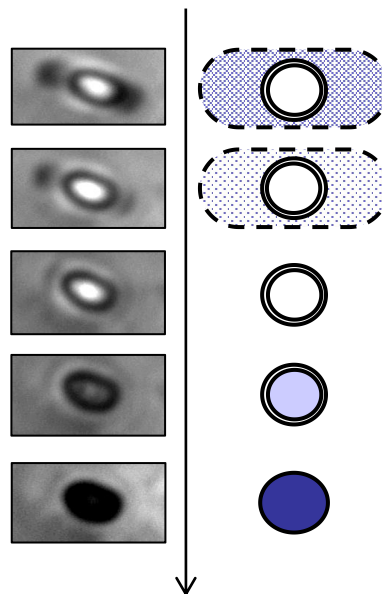

Spore premature  
germination

# Figure 6

## A

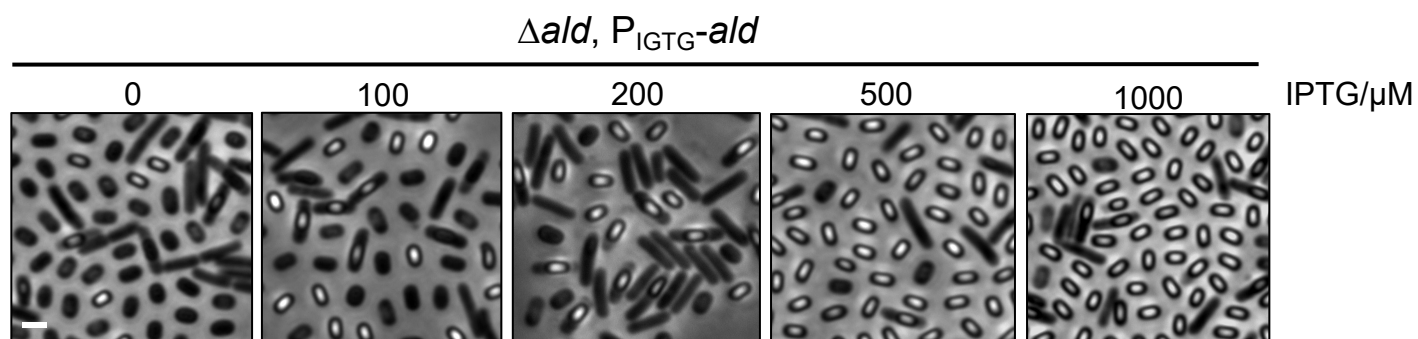

## B

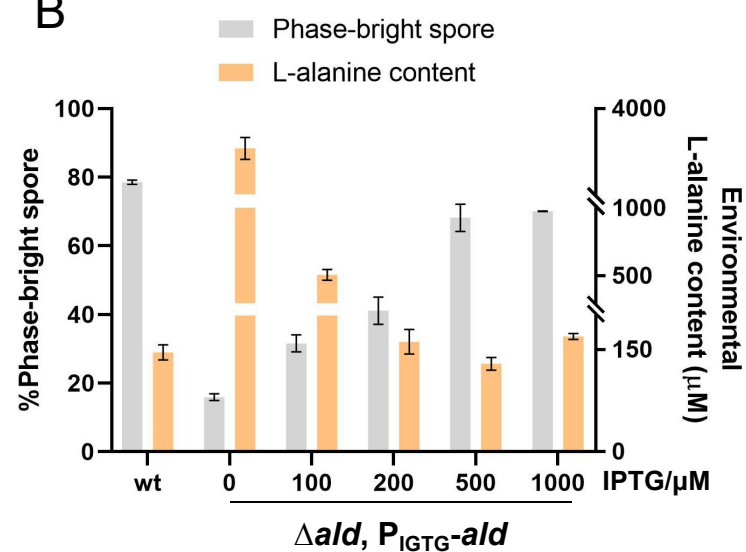

## C

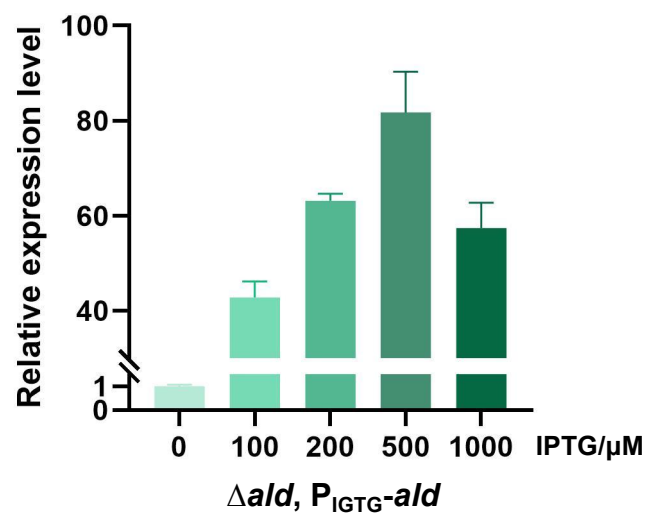



# Figure 7

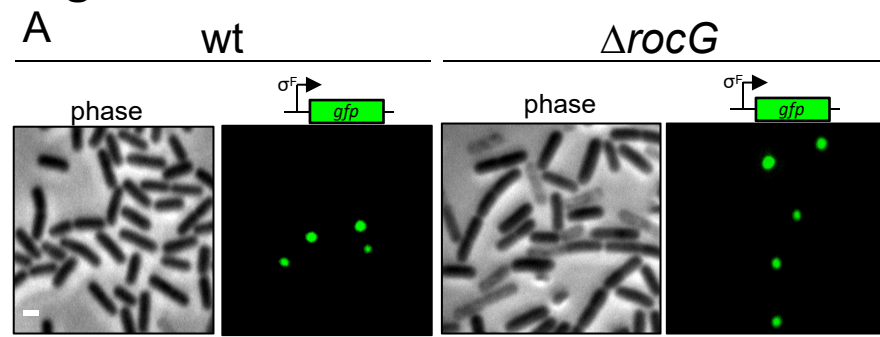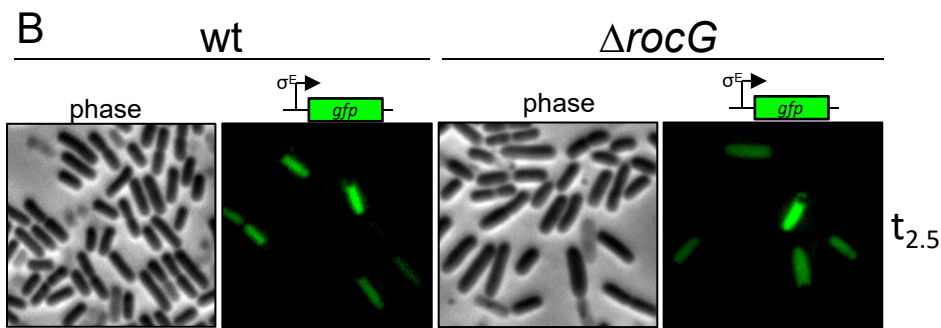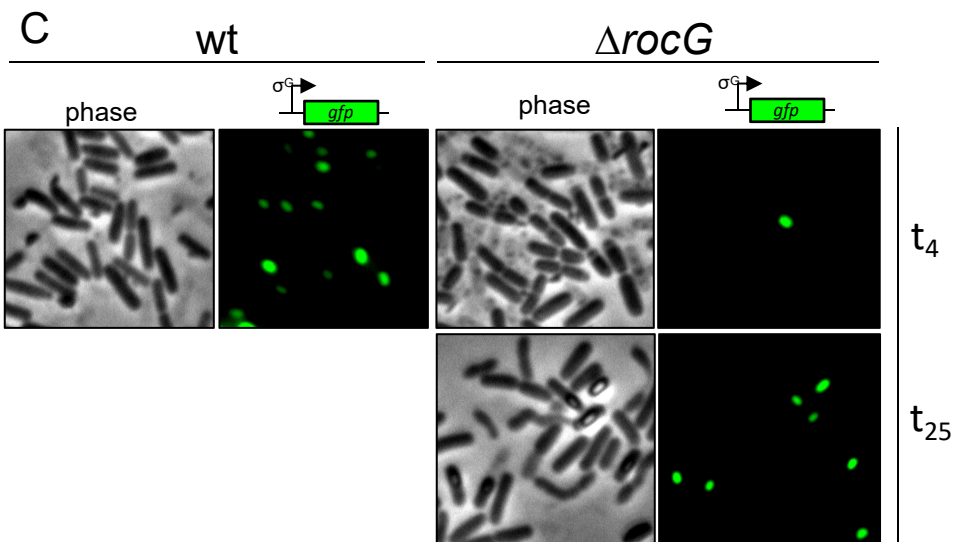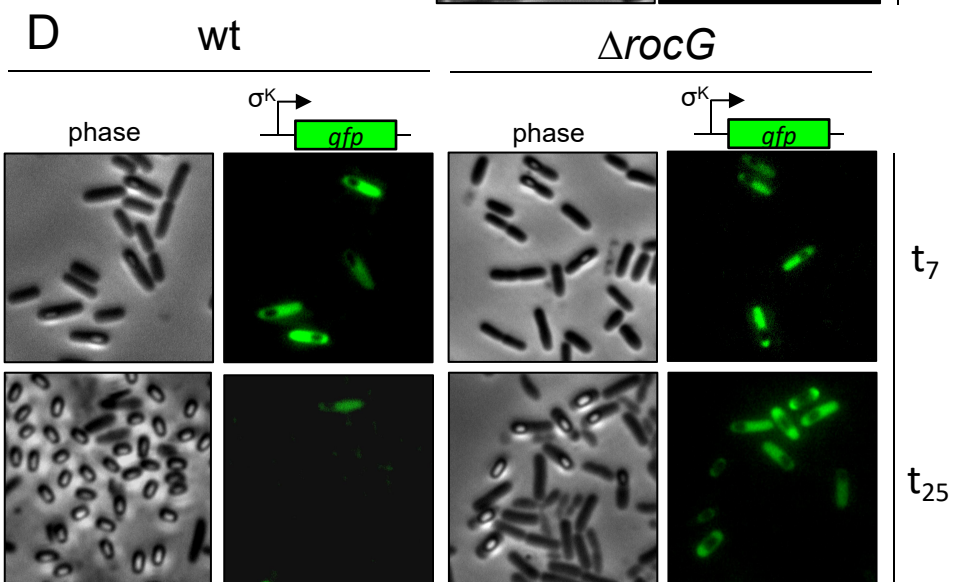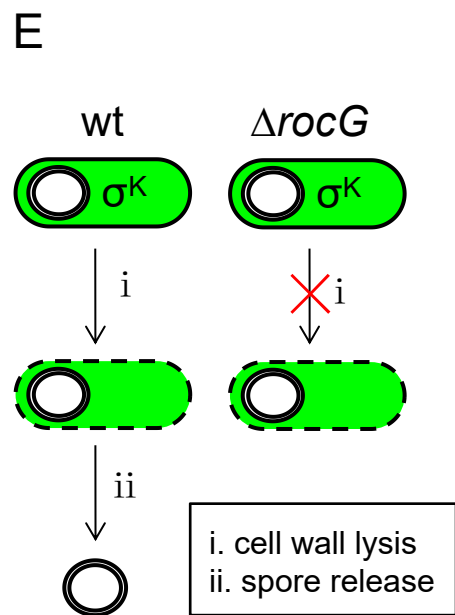

**Figure 8**

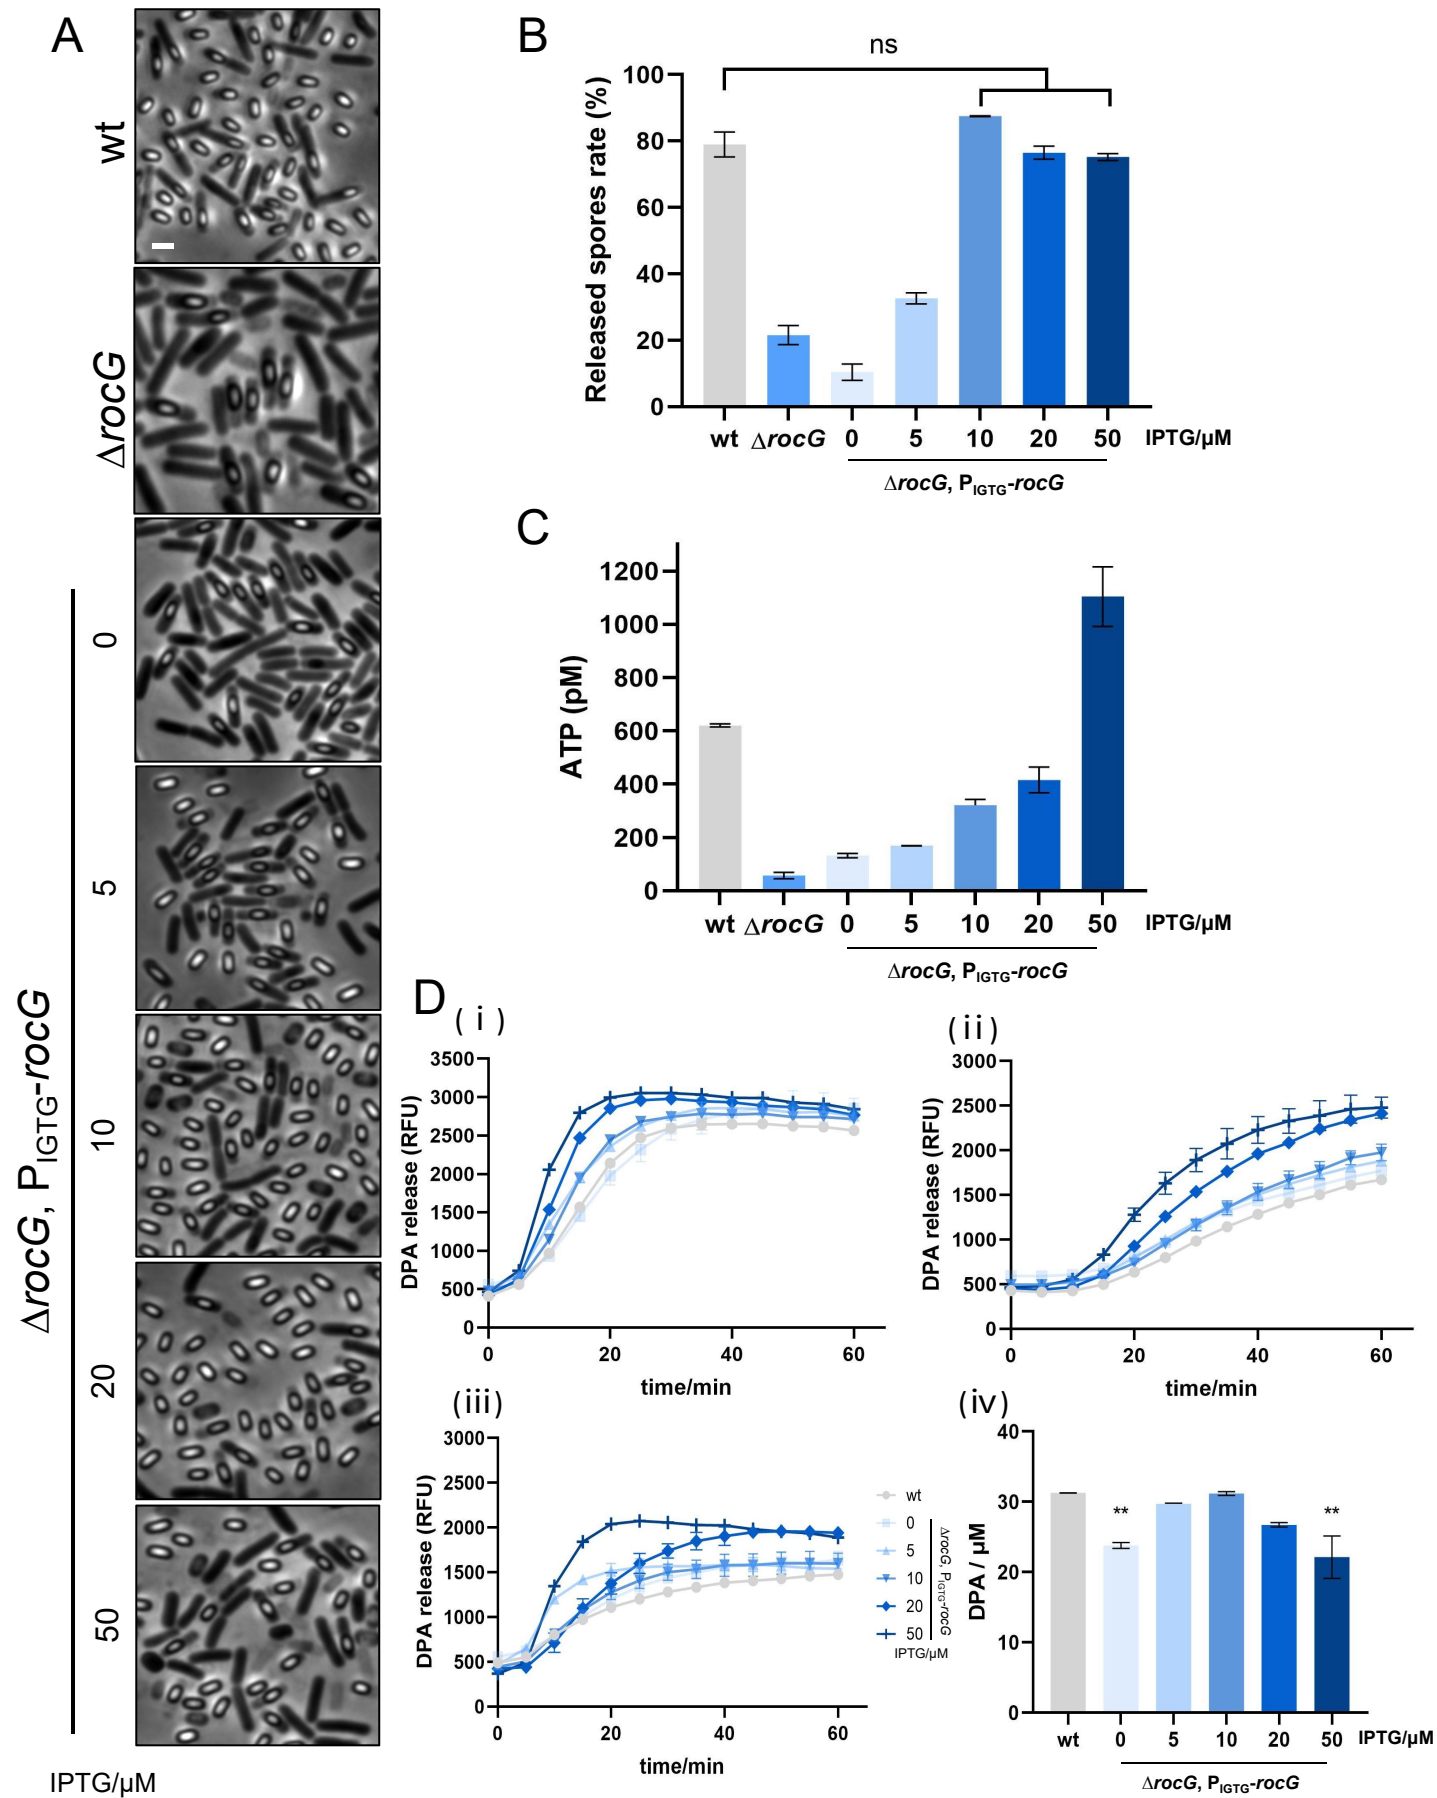

Source: https://www.biorxiv.org/content/biorxiv/early/2024/03/04/2024.03.04.583258.full.pdf
